# Supplementary material
Source: Royal Society of Chemistry journal article supplement (doi:10.1039/d6ja00005c)
Supplement: d6ja00005c1.pdf [file d6ja00005c1.pdf]

## Step-by-Step Calculation for Cr Systematic Error Correction

To further clarify the proposed hybrid correction framework, this section provides the detailed calculation process for a 0.500 ppm Cr sample

### 1. Initial Bias in Basic Calibration (BC)

The normalized intensity ( $I_{Cr}/I_{Zn}$ ) of the test sample was substituted into the BC equation:  $I_{Cr}/I_{Zn} = 0.0891C_x + 0.0027$ . The predicted concentration  $C_x$  was 1.0899 ppm, leading to a relative error (RE) of 118.0%.

### 2. Standard Addition Method (SAM) with Proportional Error Elimination

Matrix dilution was performed to reach the saturation interval. At a dilution volume of 3200  $\mu\text{L}$  ( $SAC_2$ ), the system reached a state where proportional error was minimized. The  $SAC_2$  curve was  $I_{Cr}/I_{Zn} = 0.0198C_x + 0.0140$ . The concentration  $C_x$  was 0.7071 ppm (RE: 41.4%). While improved, the significant RE indicates the persistence of constant error.

### 3. Final Correction via ANCOVA and Youden Calibration

Step A (ANCOVA): Slopes of  $SAC_1$  and  $SAC_2$  were pooled to  $b_p = 0.0210 \text{ ppm}^{-1}$ . The adjusted intercept ( $a'_A$ ) for the 3200  $\mu\text{L}$  system was calculated as 0.0133.

Step B (Youden Blank): The Youden blank ( $Y_B$ ) was determined from the  $1/N$  plot as 0.0033.

Final Integrated Calculation:

$$c_x = \frac{a'_A - Y_B}{b_p} = \frac{0.0133 - 0.0033}{0.0210} \approx 0.5051 \text{ ppm}$$

The RE was reduced to 1.0%, demonstrating the necessity of correcting both error types.
